# Supplementary material for: Regulation of p53 Activity by (+)-Epiloliolide Isolated from Ulva lactuca
Source: MDPI journal article supplement (doi:10.3390/md19080450), 2021-08-05
Supplement: s1 [file s1]

---

## Supporting Information

# Regulation of p53 Activity by (+)-Epiloliolide Isolated from *Ulva lactuca*

Yuheon Chung <sup>1</sup>, Seula Jeong <sup>1</sup>, In-Kyoung Lee <sup>2</sup>, Bong-Sik Yun <sup>2</sup>, Jung Sup Lee <sup>3</sup>, Seungil Ro <sup>4</sup> and Jong Kun Park <sup>1,\*</sup>

<sup>1</sup> Division of Biological Science, Wonkwang University, Iksan 54538, Korea; yhchung@wku.ac.kr (Y.C.); sla0940@wku.ac.kr (S.J.)

<sup>2</sup> Division of Biotechnology and Advanced Institute of Environment and Bioscience, College of Environmental and Bioresource Sciences, Jeonbuk National University, Iksan 54596, Korea; iklee@jbnu.ac.kr (I.-K.L.); bsyun@jbnu.ac.kr (B.-S.Y.)

<sup>3</sup> Department of Life Science, Chosun University, Gwangju 61452, Korea; jsplee@chosun.ac.kr

<sup>4</sup> Department of Physiology and Cell Biology, University of Nevada School of Medicine, Reno, NV 89557, USA; sro@med.unr.edu(R.S.)

\* Correspondence: jkpark@wku.ac.kr; Tel.: +82-10-2936-2781; Fax: +82-63-843-2781

## Table of Contents

**Figure S1.**  $^1\text{H}$  NMR spectrum of (+)-epiloliolide.

**Figure S2.**  $^{13}\text{C}$  NMR spectrum of (+)-epiloliolide.

**Figure S3.**  $^1\text{H}$ - $^1\text{H}$  COSY spectrum of (+)-epiloliolide.

**Figure S4.** HMQC spectrum of (+)-epiloliolide.

**Figure S5.** HMBC spectrum of (+)-epiloliolide.

**Figure S6.** NOE difference spectrum of (+)-epiloliolide.

**Figure S7.**  $^1\text{H}$  (red) and  $^{13}\text{C}$  (blue) peaks assignments of (+)-epiloliolide.

**Figure S8.** Two-dimensional NMR correlations of (+)-epiloliolide.

**Figure S9.** Expression of p-p53 on full length gels.

**Figure S10.** Expression of p53 on full length gels.

**Figure S11.** Expression of p21 on full length gels.

**Figure S12.** Expression of Bim on full length gels.

**Figure S13.** Expression of Bax on full length gels.

**Figure S14.** Expression of Bcl-2 on full length gels.

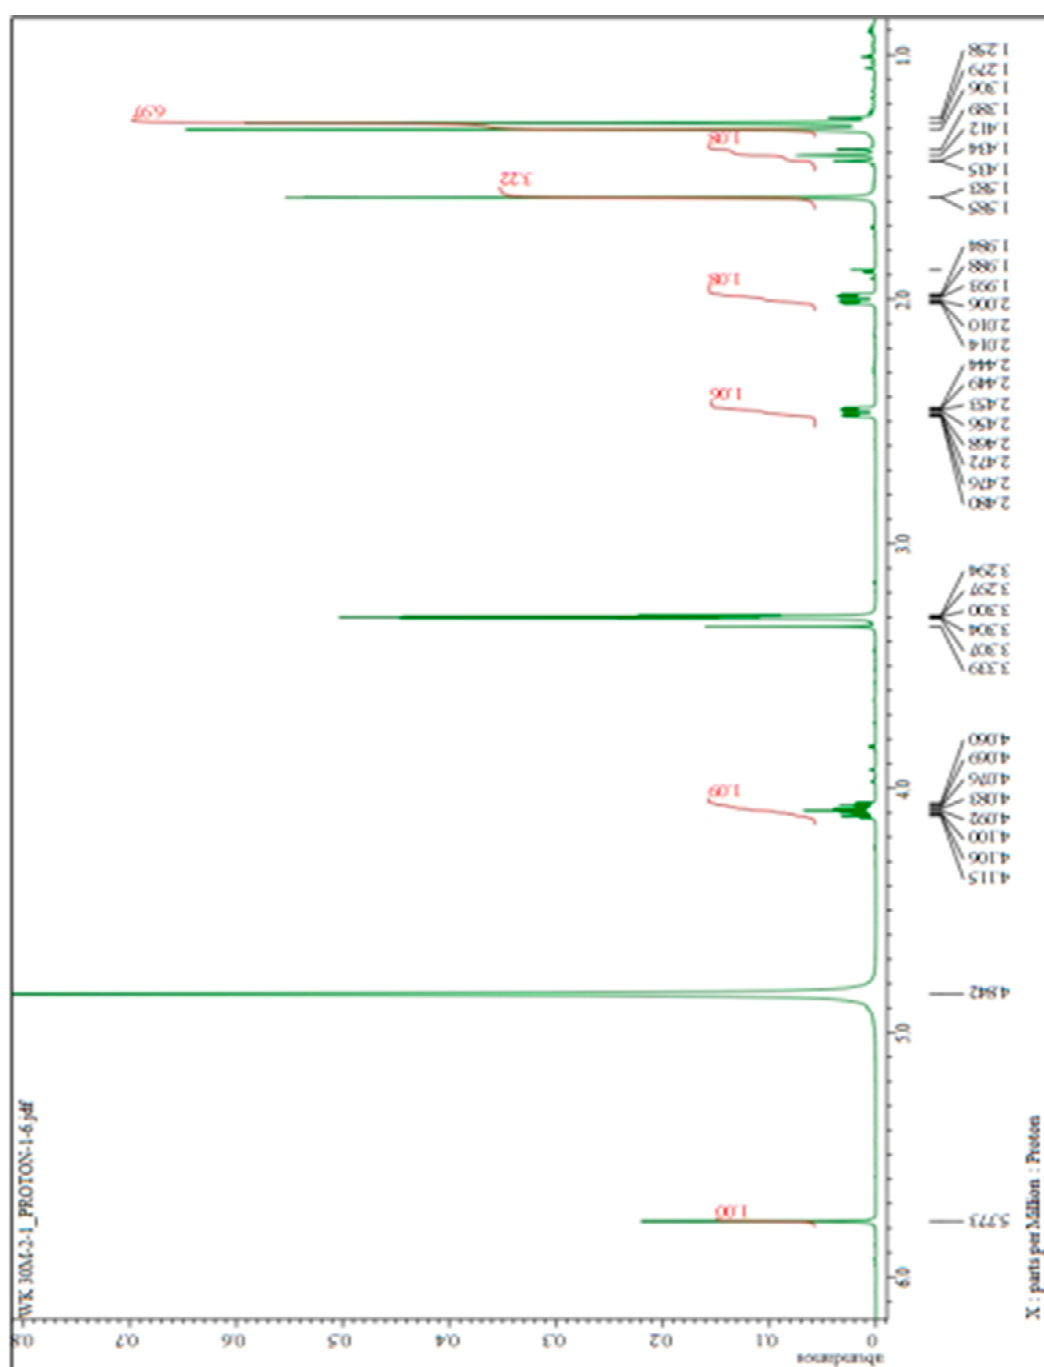

Figure S1.  $^1\text{H}$  NMR spectrum of (+)-epiloliolide.

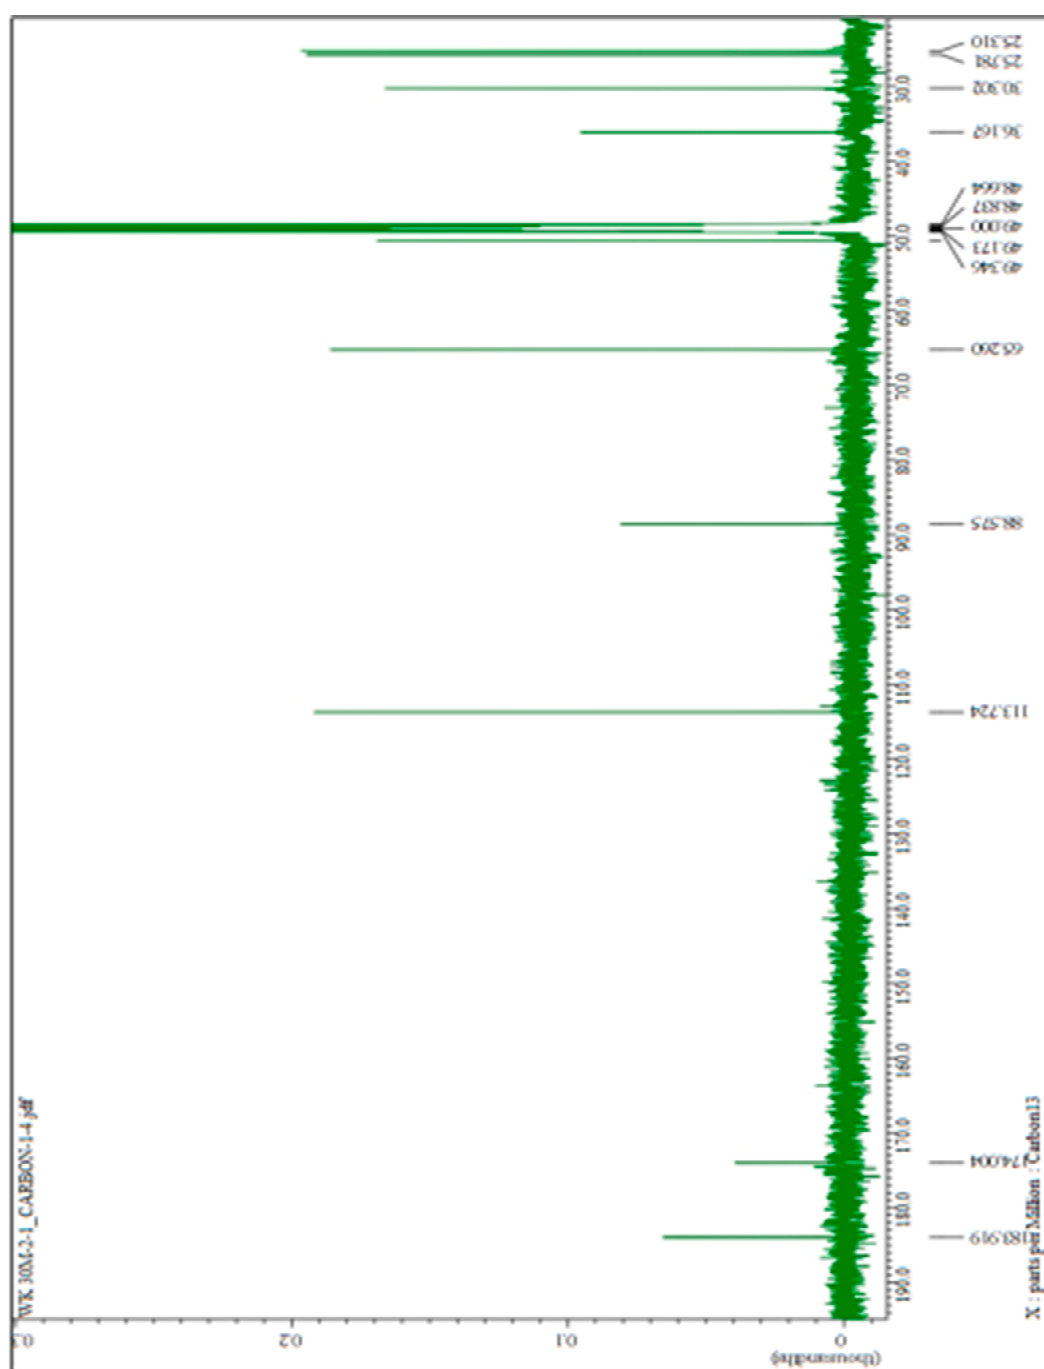

Figure S2.  $^{13}\text{C}$  NMR spectrum of (+)-epiloliolide.



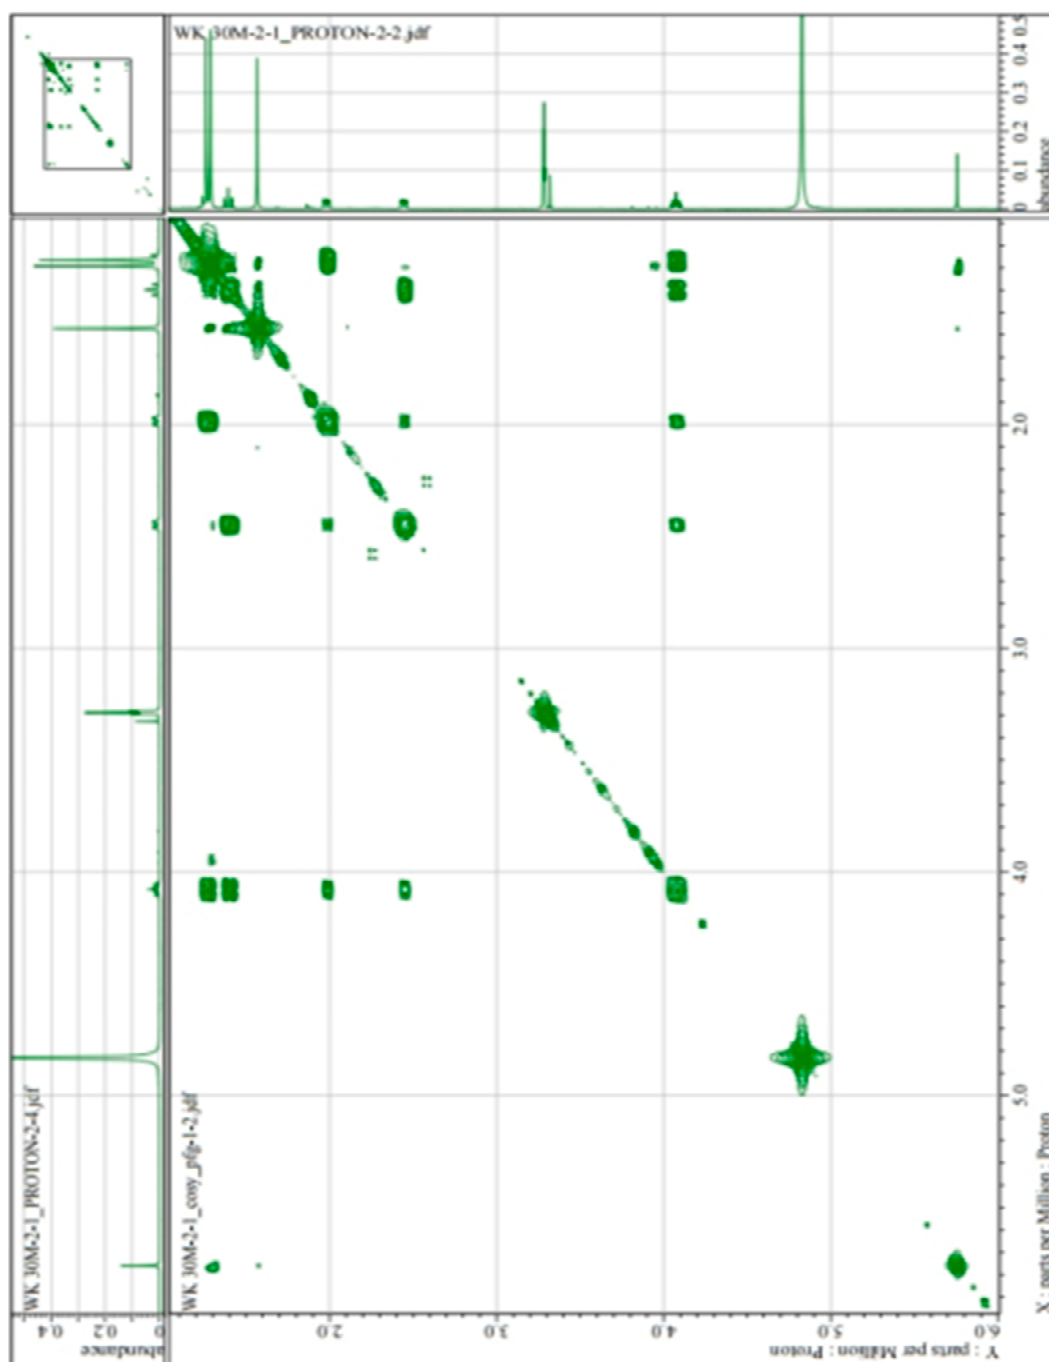

Figure S3.  $^1\text{H}$ - $^1\text{H}$  COSY spectrum of (+)-epiloliolide.

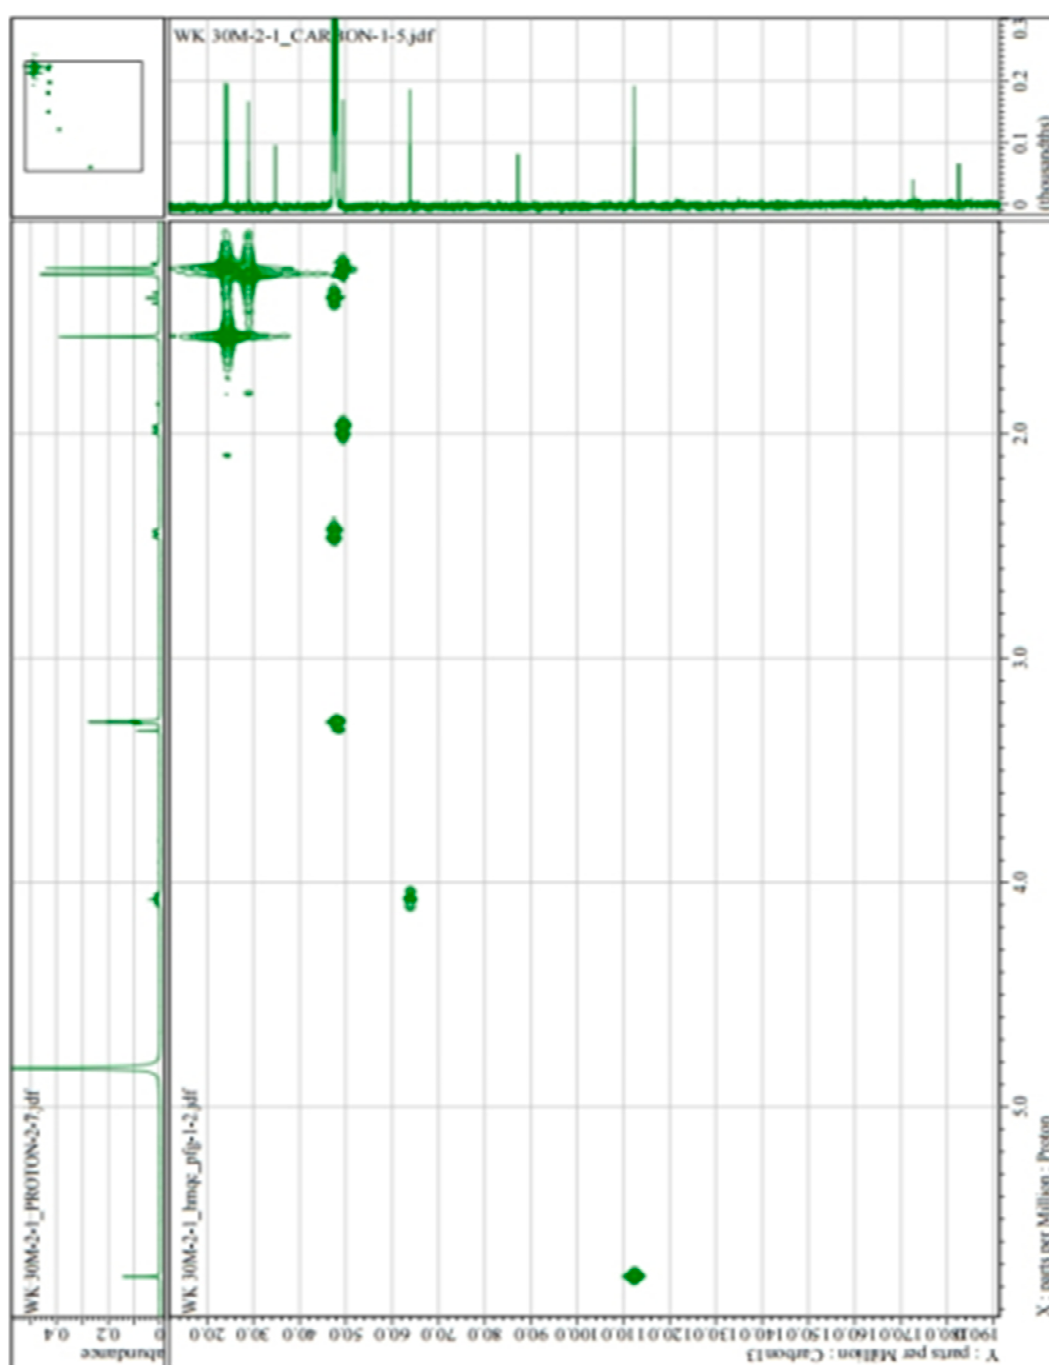

Figure S4. HMQC spectrum of (+)-epiloliolide.

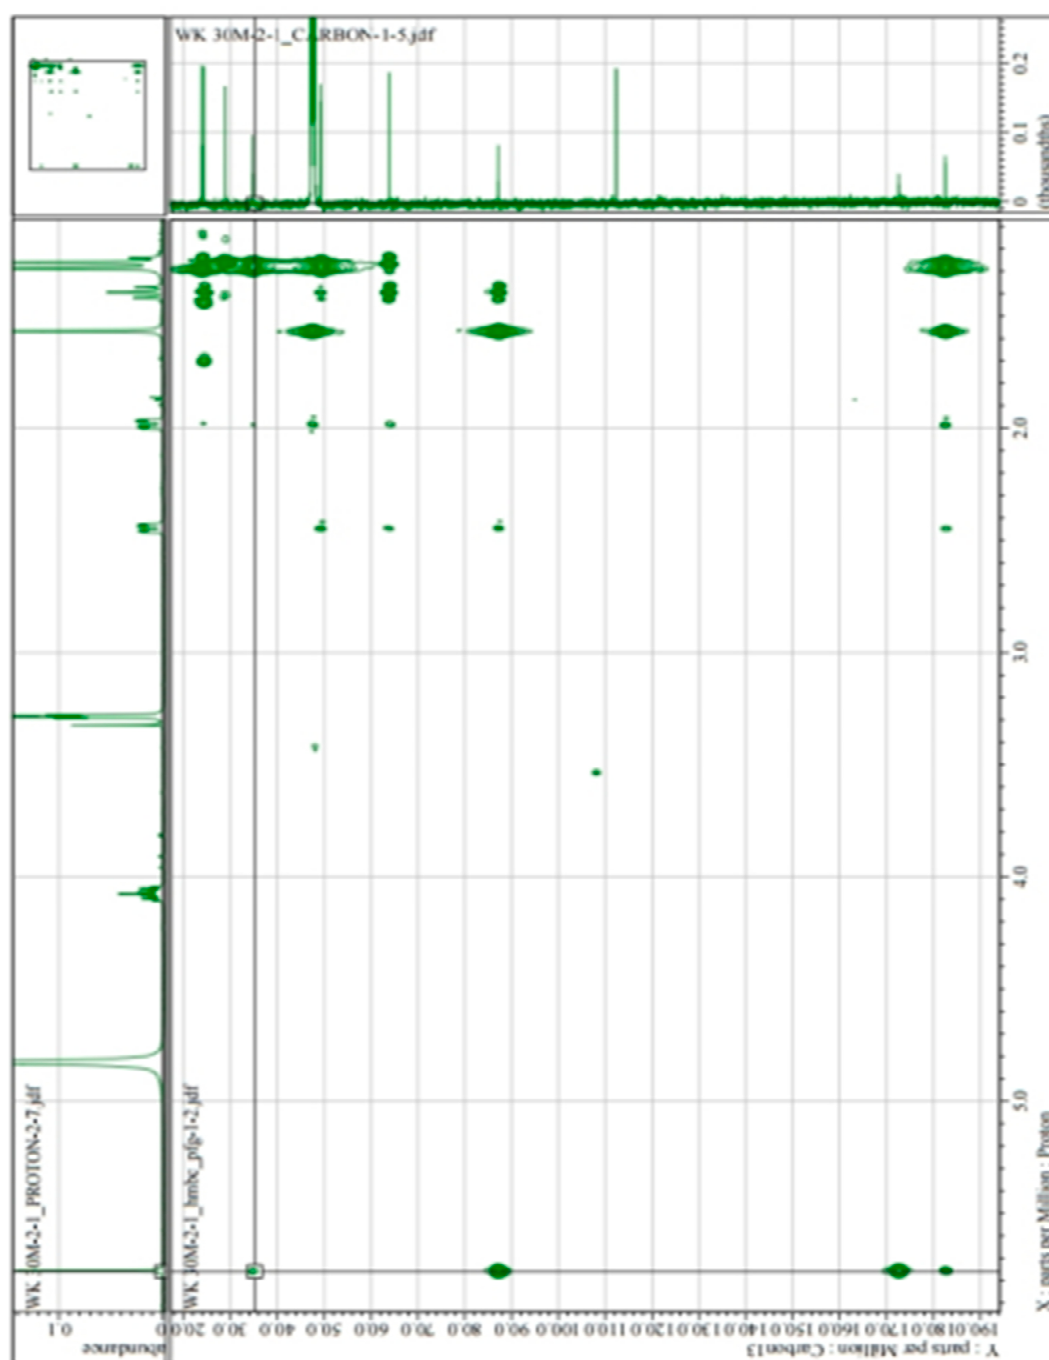

Figure S5. HMBC spectrum of (+)-epiloliolide.

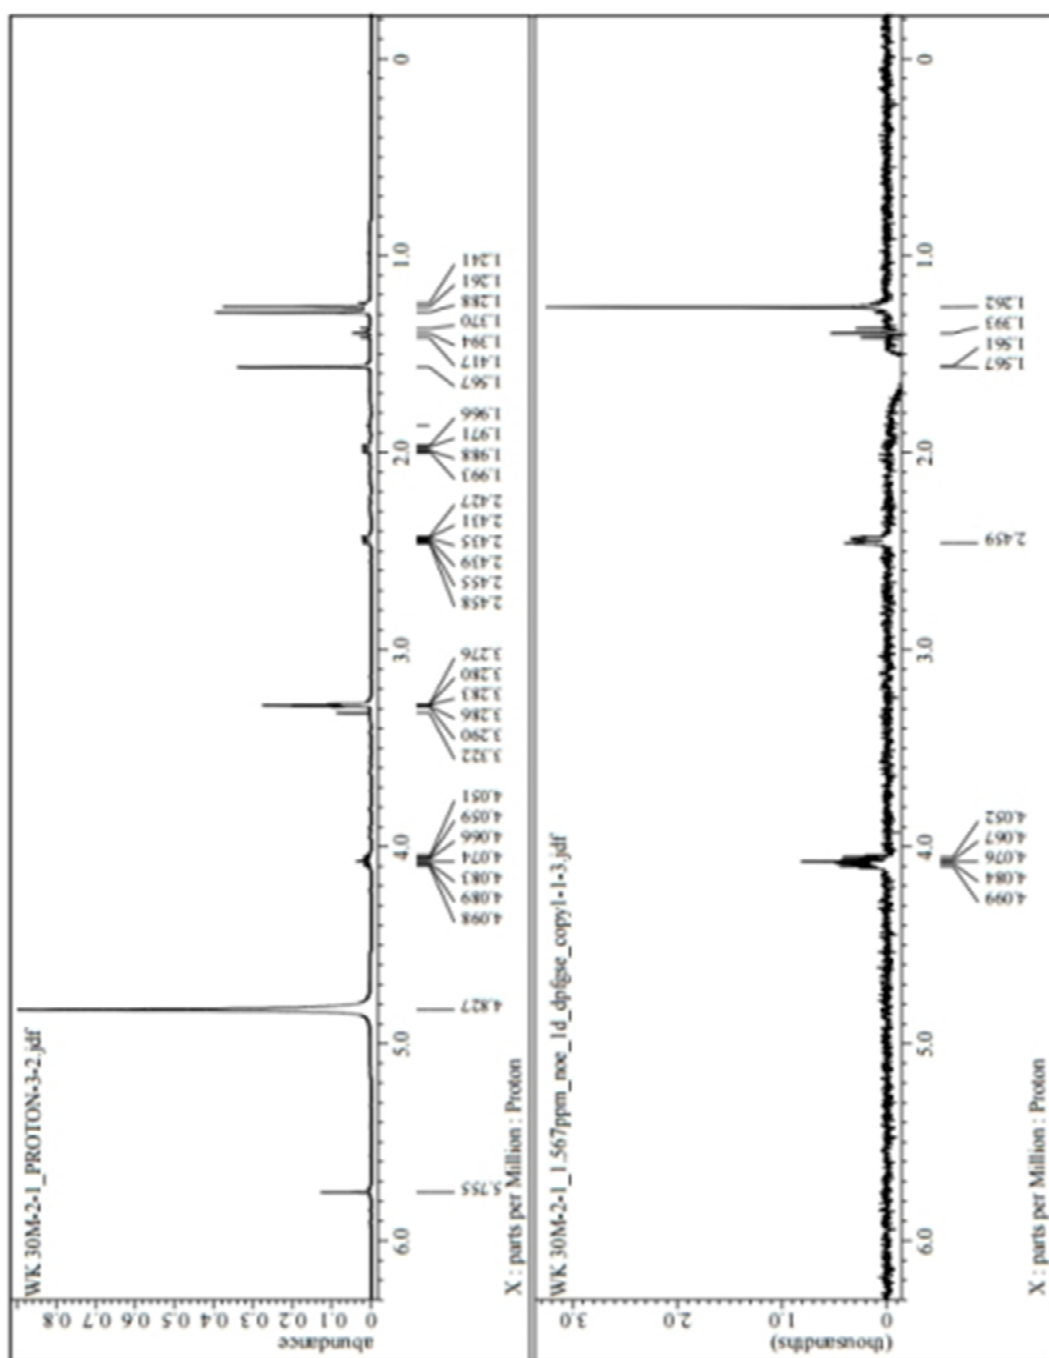

Figure S6. NOE difference spectrum of (+)-epiloliolide.

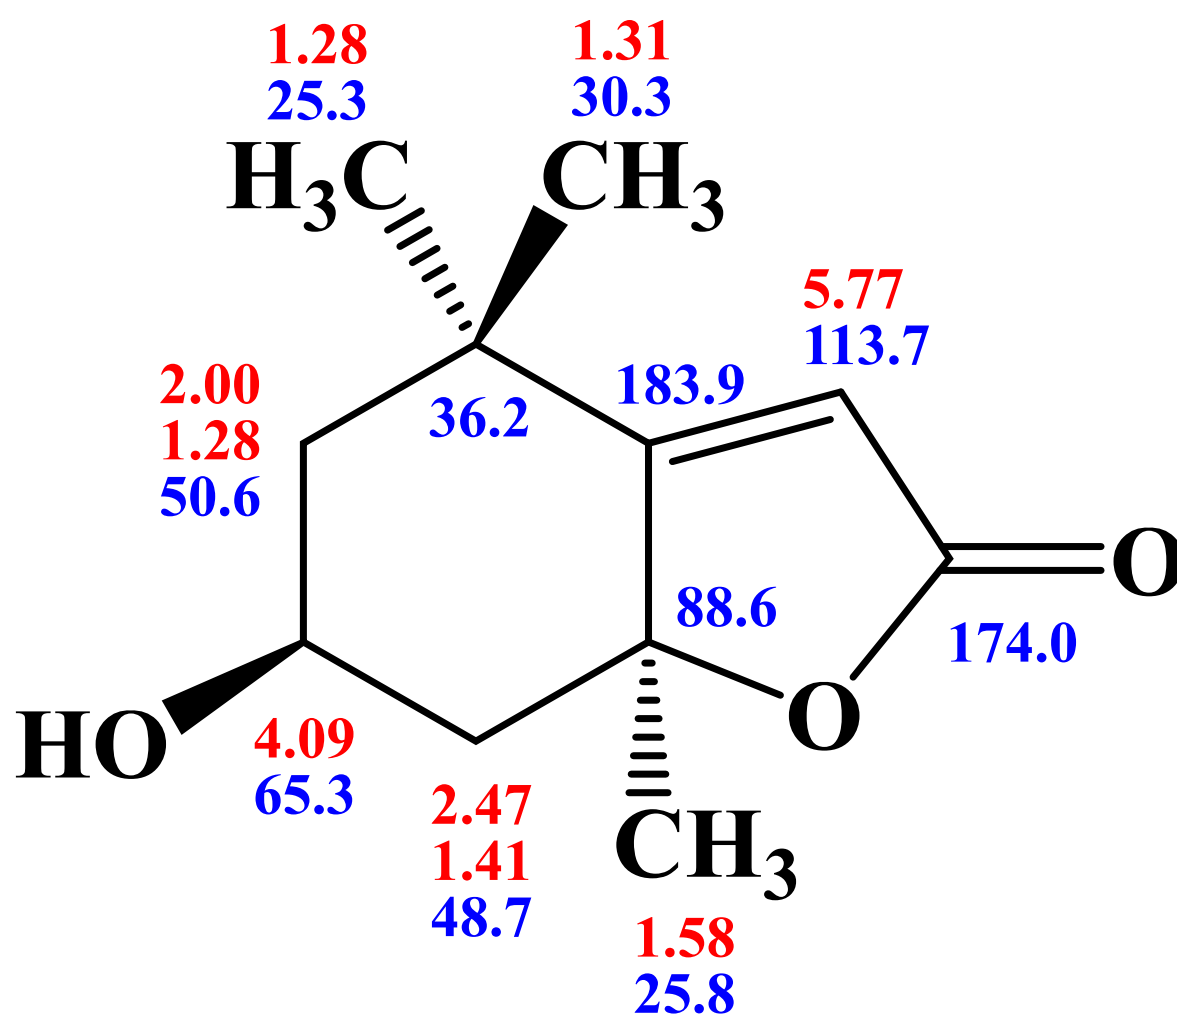

Figure S7. <sup>1</sup>H (red) and <sup>13</sup>C (blue) peaks assignments of (+)-epiloliolide.

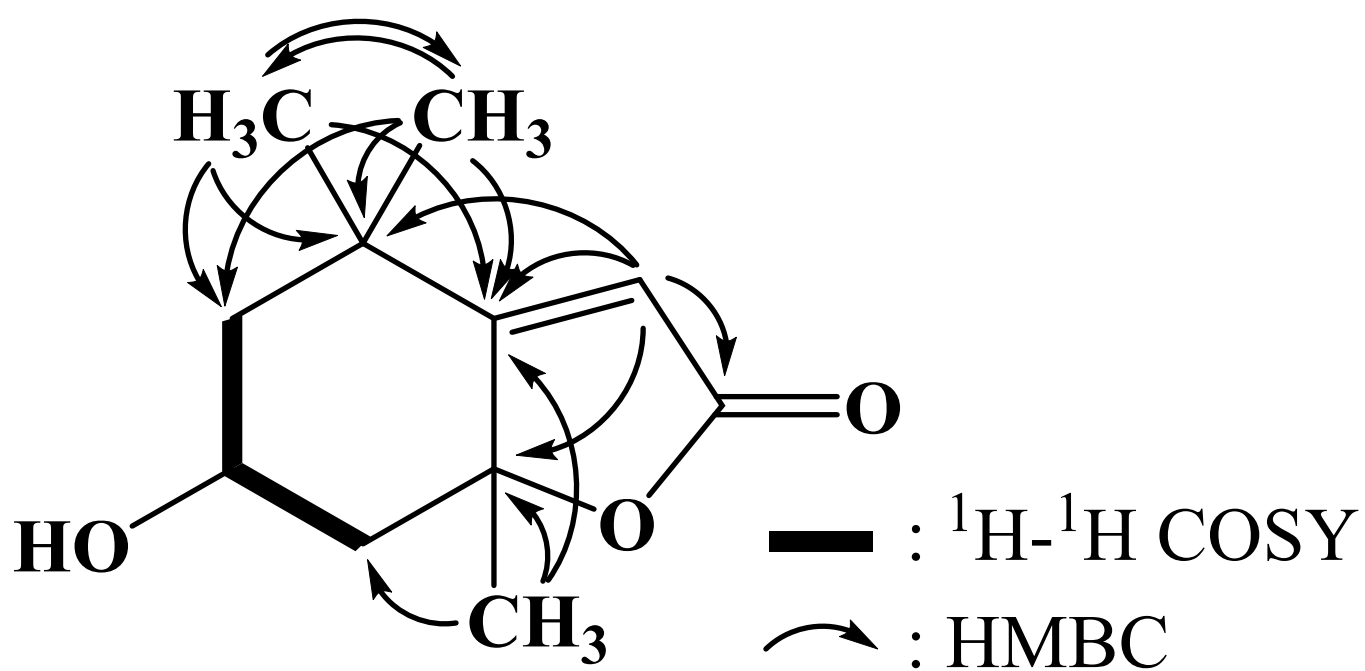

**Figure S8.** Two-dimensional NMR correlations of (+)-epiloliolide.

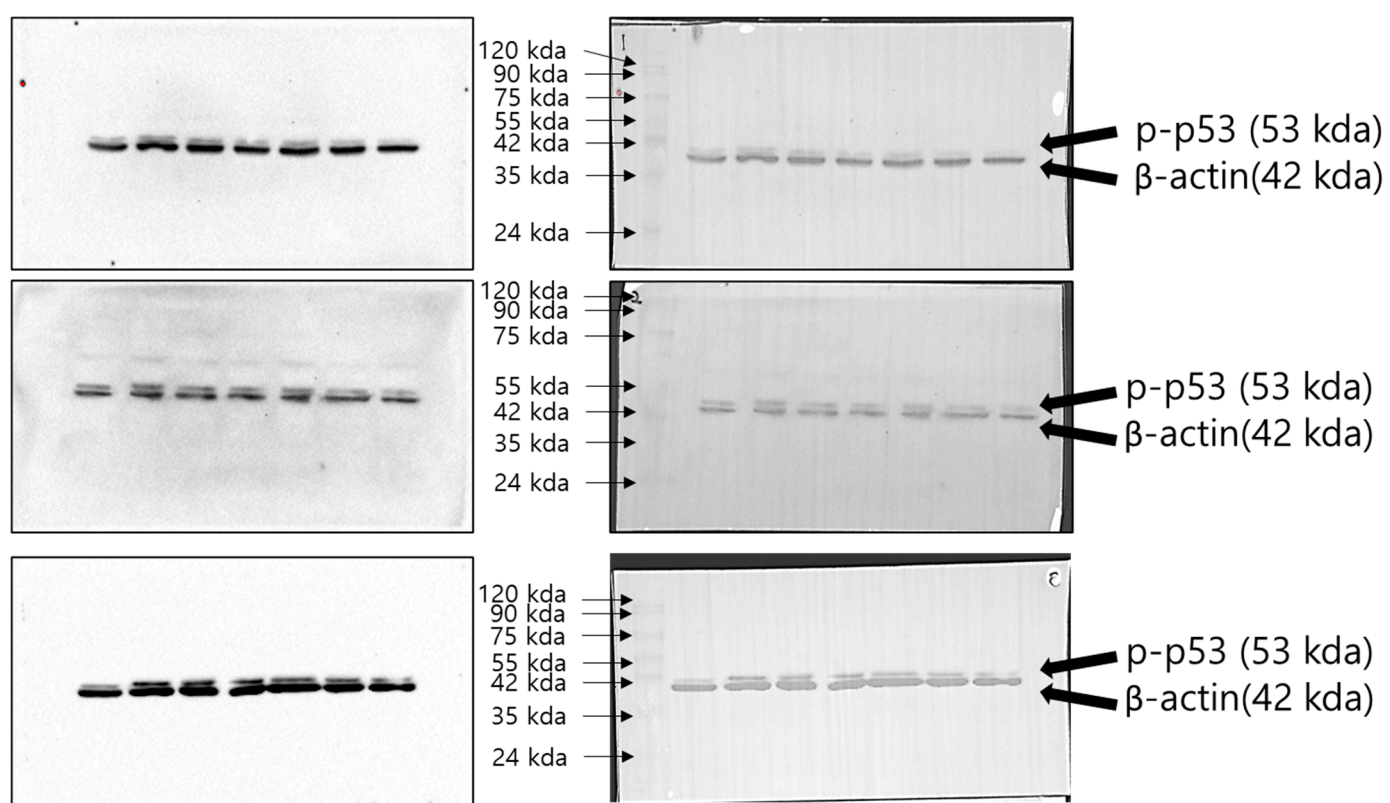

**Figure S9.** Expression of p-p53 on full length gels.

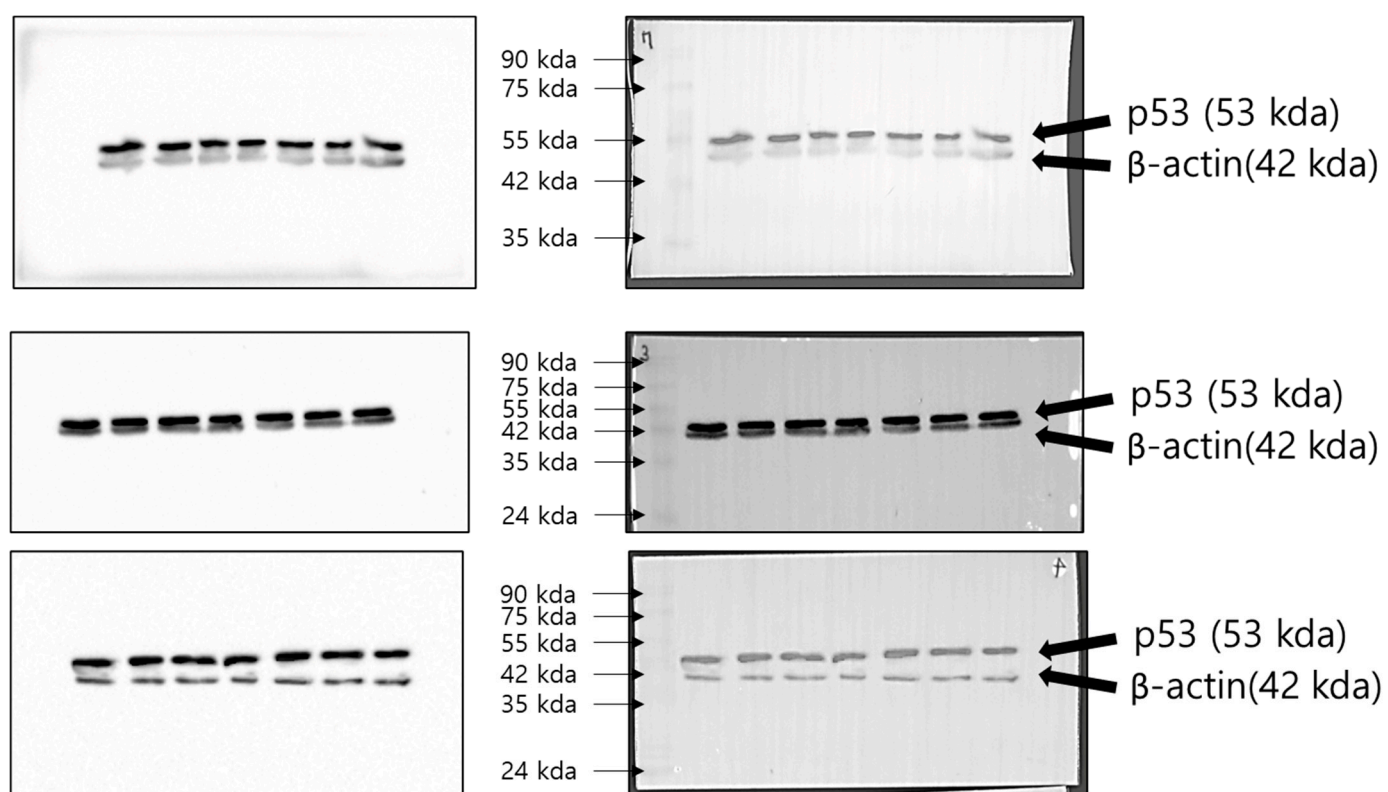

**Figure S10.** Expression of p53 on full length gels.



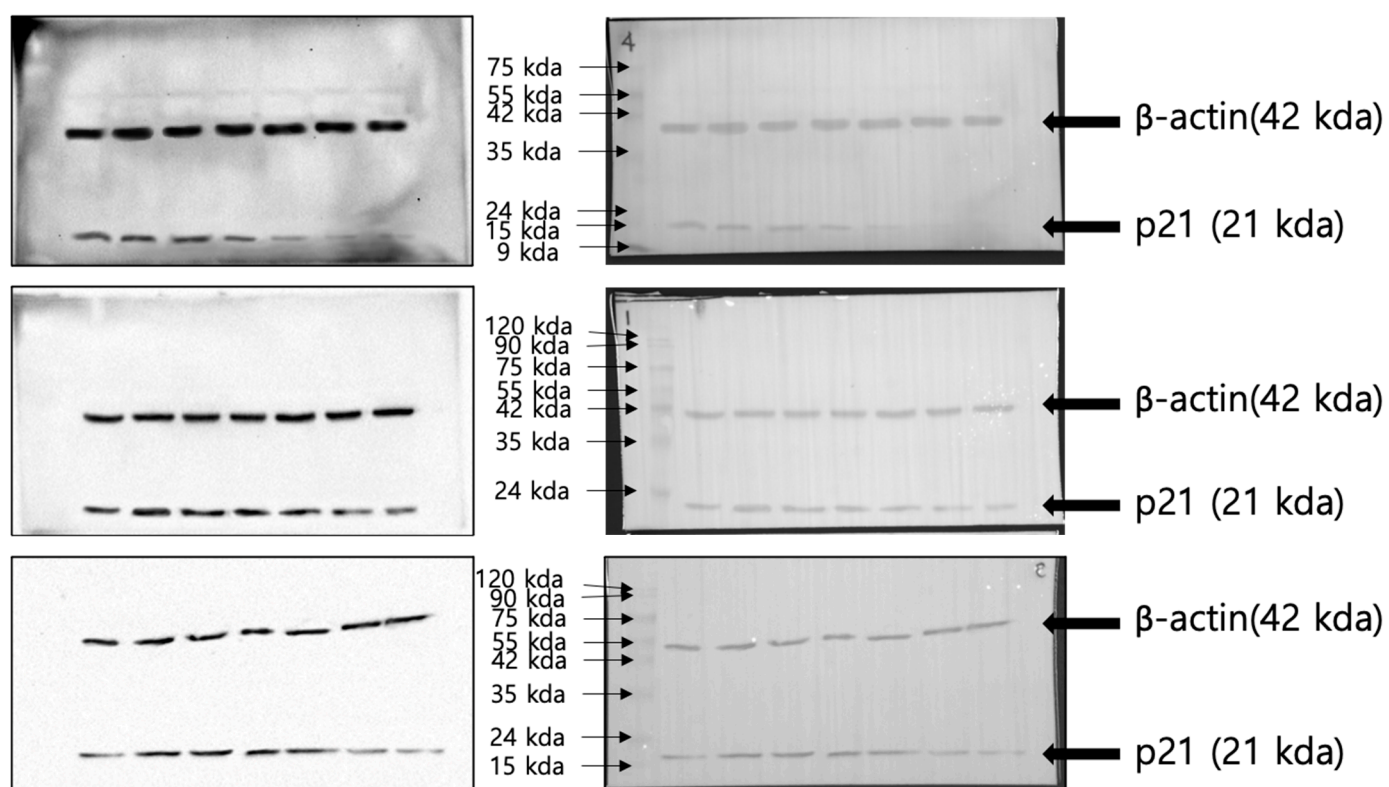

**Figure S11.** Expression of p21 on full length gels.

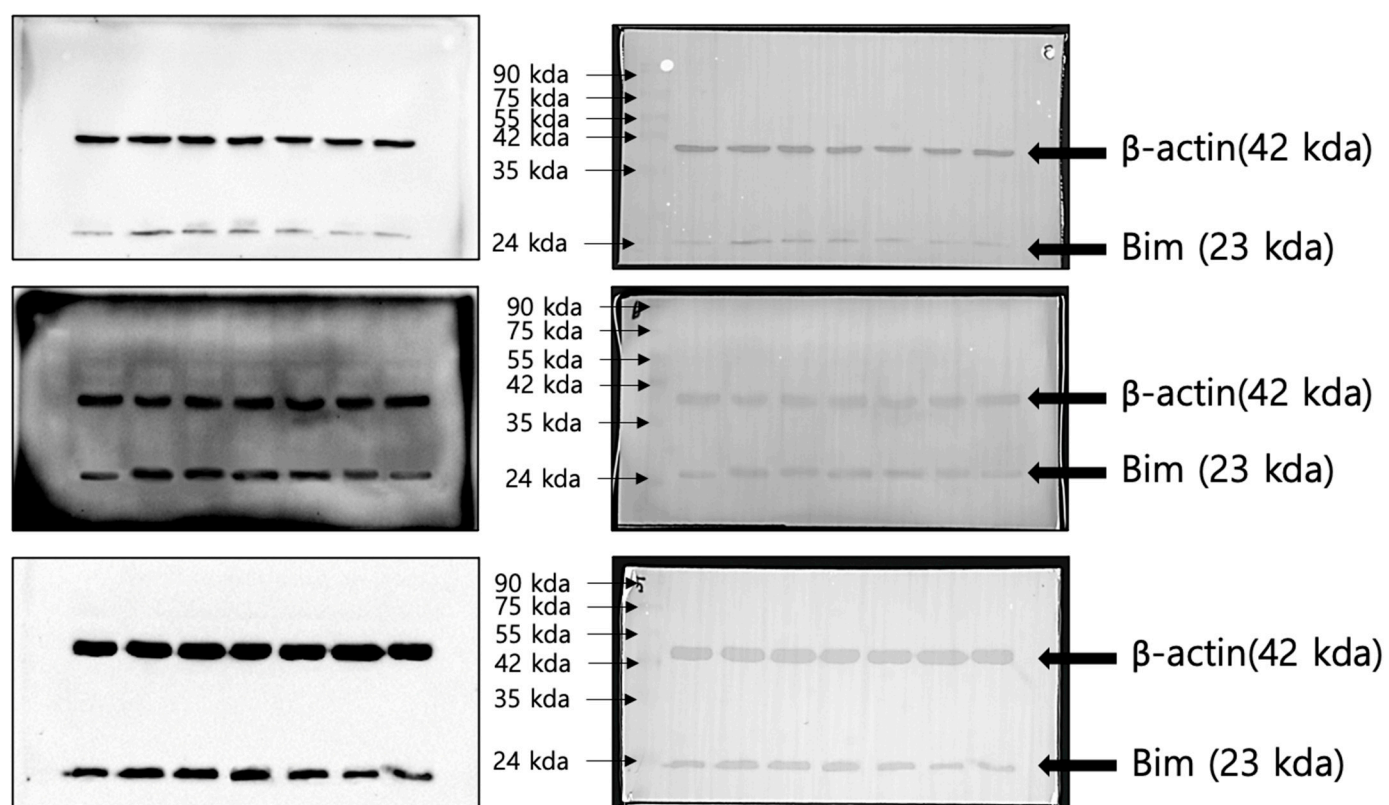

**Figure S12.** Expression of Bim on full length gels.

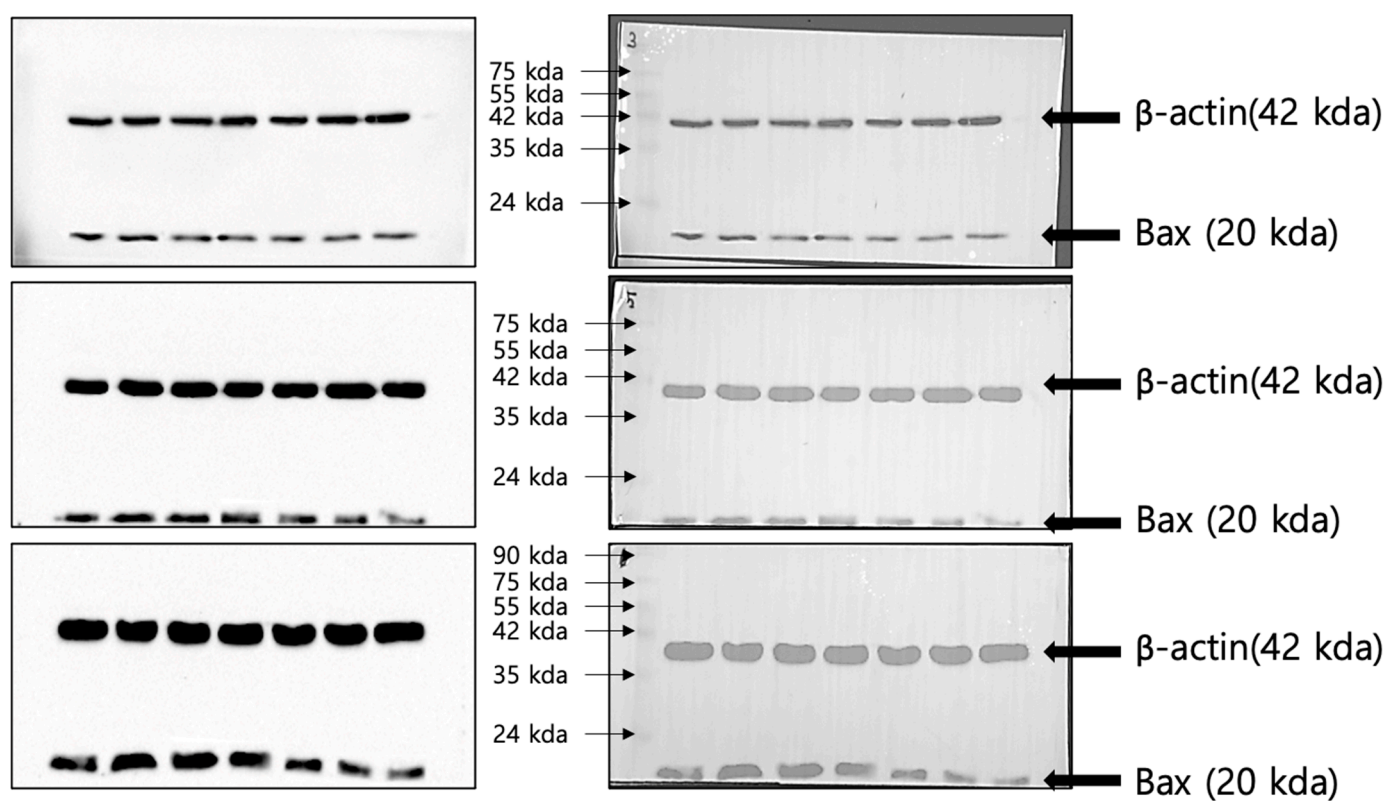

**Figure S13.** Expression of Bax on full length gels.

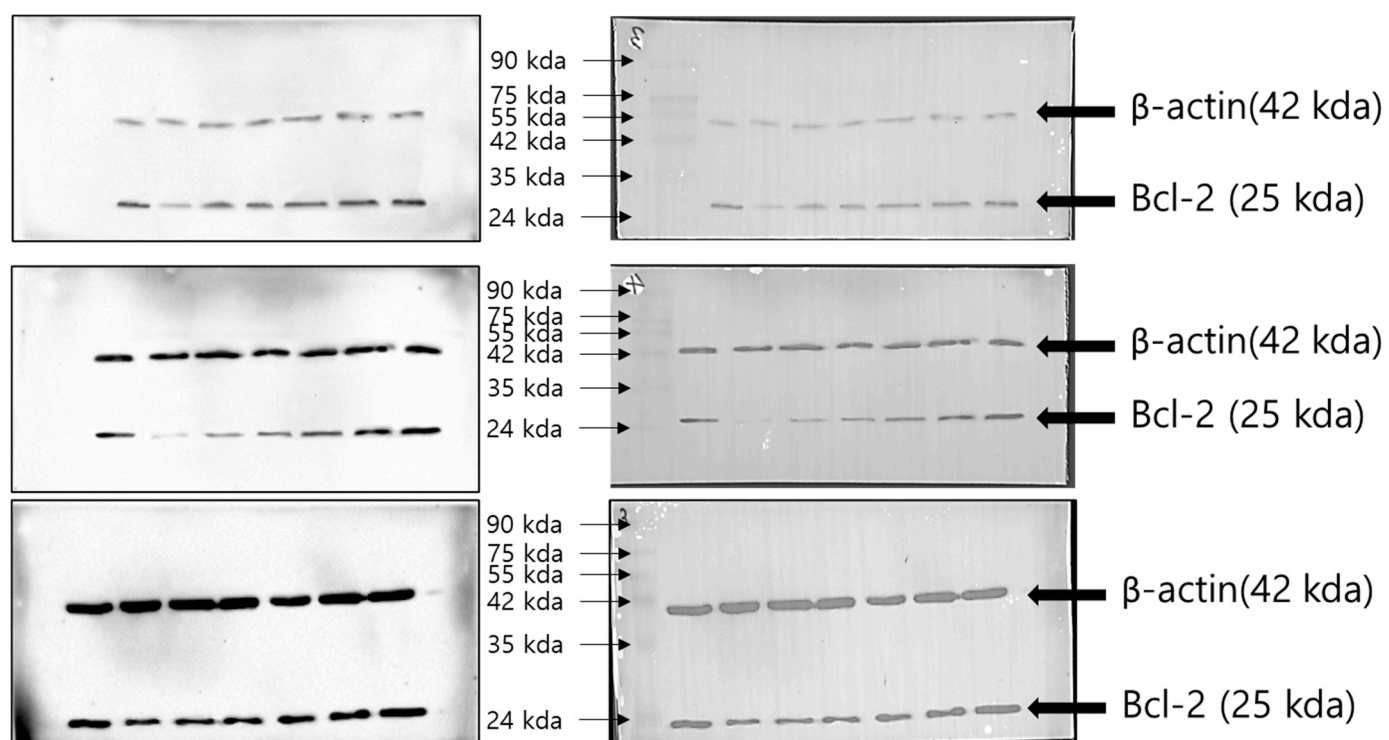

**Figure S14.** Expression of Bcl-2 on full length gels.
